# Supplementary material
Source: PubMed Central journal article supplement (PMC2840306)
Supplement: 1000120107_pnas.1000120107_SI.pdf [file 1000120107_pnas.1000120107_SI.pdf]

# Supporting Information

Chen et al. 10.1073/pnas.1000120107

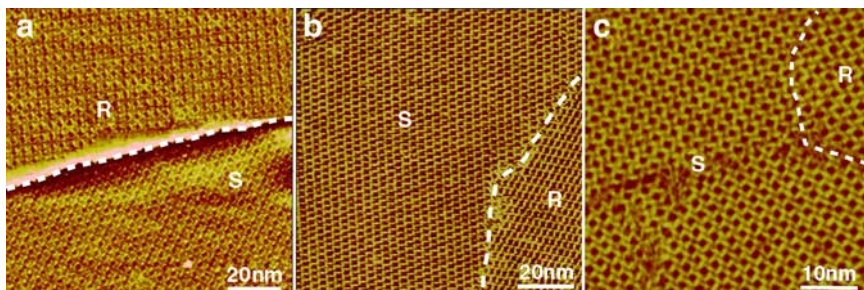

**Fig. S1.** Large-scale STM images of three chiral patterns of OPV3-CHO; each image contains two homochiral domains with opposite chirality. (a) Windmill structure:  $V_{\text{bias}} = 683$  mV;  $I_t = 657$  pA. (b) Chiral linear structure:  $V_{\text{bias}} = 687$  mV;  $I_t = 482$  pA. (c) Dense windmill structure:  $V_{\text{bias}} = 634$  mV;  $I_t = 650$  pA.

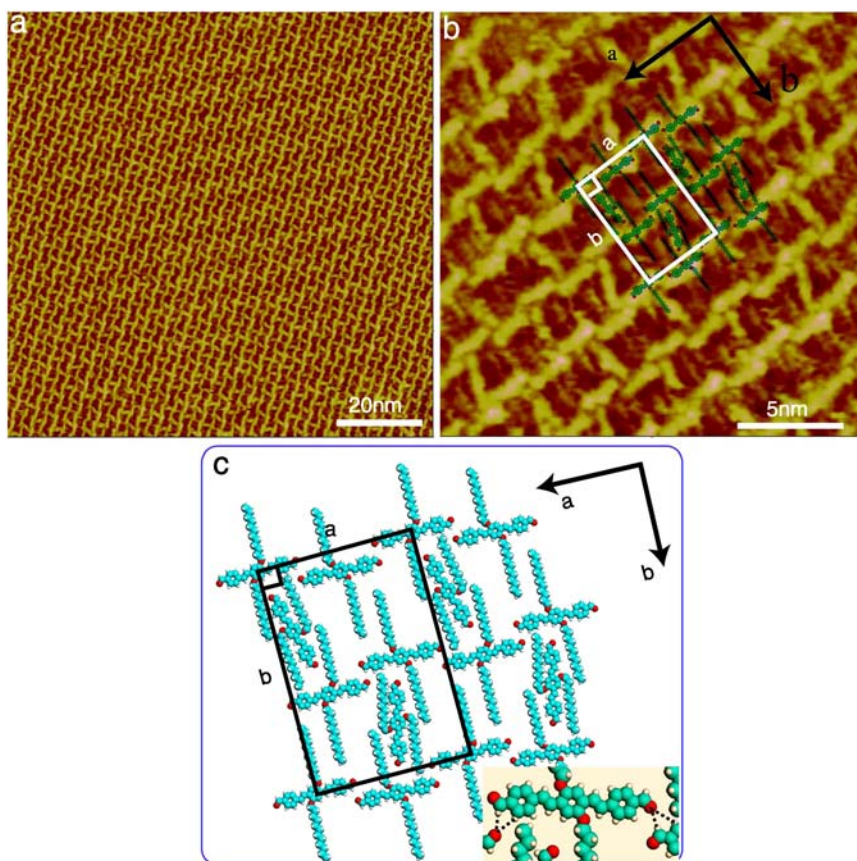

**Fig. S2.** Self-assembly of achiral linear structure. (a) Large-scale STM image:  $V_{\text{bias}} = 650$  mV;  $I_t = 722$  pA. (b) High-resolution STM image:  $V_{\text{bias}} = 650$  mV;  $I_t = 750$  pA. (c) Structural model for adlayer. The OPV backbones shift alternatively left or right along the direction "a" indicated by the arrow. Between these bright lines along the a direction, there are OPV backbones running roughly perpendicular to the a direction to form a network structure. Alkyl chains of OPV3-CHO extend and interdigitate along direction "b." The unit is outlined in the image with the parameters of  $a = 4.0 \pm 0.1$  nm,  $b = 5.9 \pm 0.1$  nm,  $\alpha = 90 \pm 2^\circ$ . For the H bondings here, one is  $3.1 \text{ \AA}$ ,  $174^\circ$ ; another is  $3.5 \text{ \AA}$ ,  $151^\circ$ .
